# Supplementary material
Source: PubMed Central journal article supplement (PMC4679503)

Suppl Fig. E1

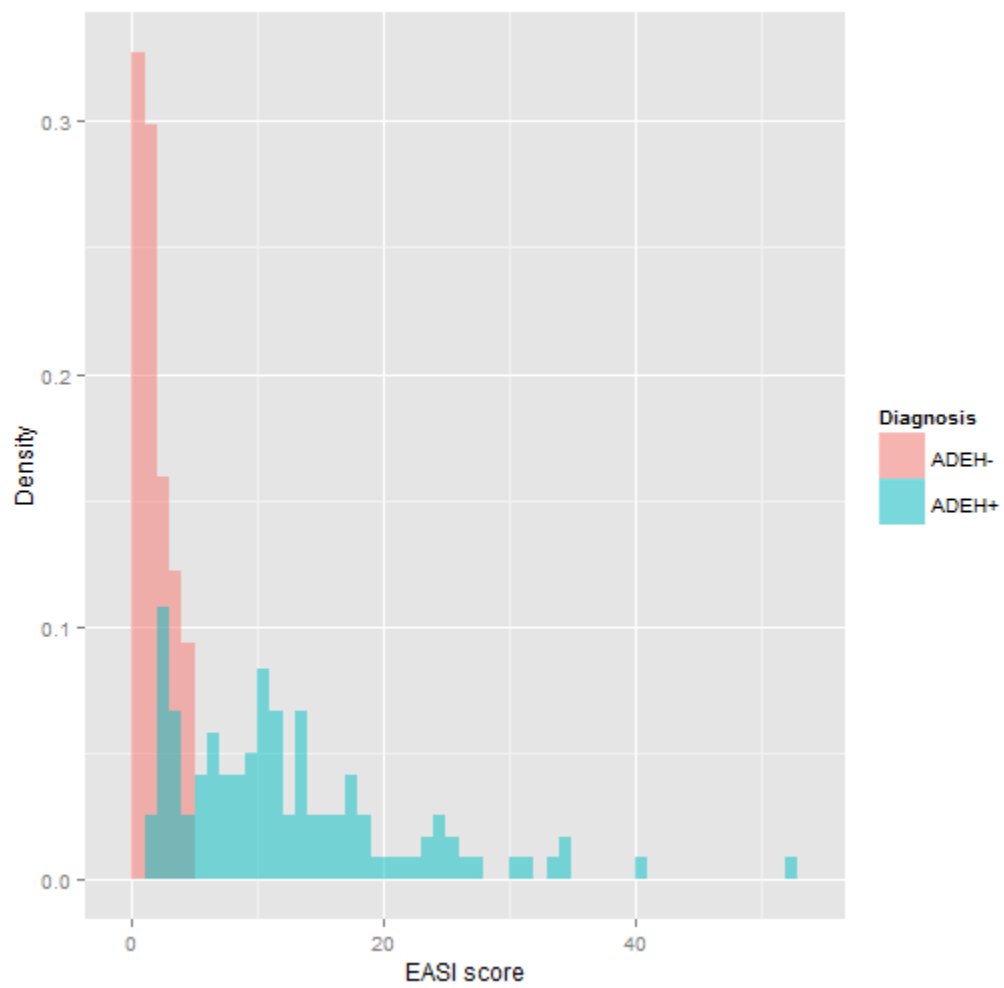

Supplement: NIHMS721126-supplement-2.pdf [file NIHMS721126-supplement-2.pdf]

## Suppl Fig. E2

### EA non-atopic controls

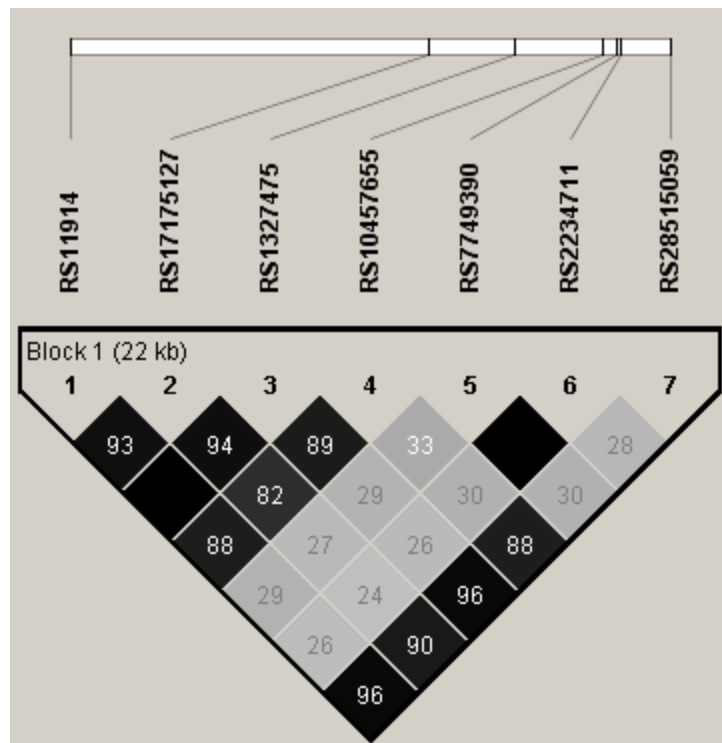

### AA non-atopic controls

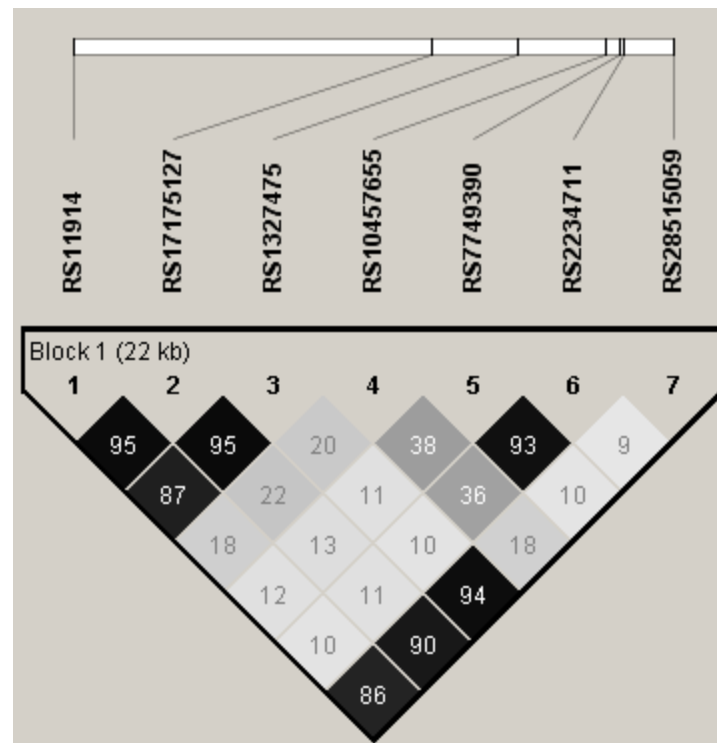

Supplement: NIHMS721126-supplement-3.pdf [file NIHMS721126-supplement-3.pdf]
